# Supplementary material for: Multiscale positive feedbacks contribute to unidirectional gastric disease progression induced by helicobacter pylori infection
Source: BMC Syst Biol. 2017 Nov 22;11:111. doi: 10.1186/s12918-017-0497-y (PMC5700561; doi:10.1186/s12918-017-0497-y)
Supplement: Additional file 1: Table S1. — Model equations and parameters. (DOCX 32 kb) [file 12918_2017_497_MOESM1_ESM.docx]

| **Restriction Point Module** | | | | | |
| --- | --- | --- | --- | --- | --- |
| **cMyc** | | | | | |
|  | |  | |  | |
| **cMyc parameters** | | | | | |
|  | |  | |  | |
| **P21** | | | | | |
|  | |  | |  | |
| **P21 parameters** | | | | | |
|  |  | |  | |  |
| **CyclinD** | | | | | |
|  | |  | |  | |
| **CyclinD parameters** | | | | | |
|  |  | |  | |  |
| **RB** | | | | | |
|  | |  | |  | |
| **RB parameters** | | | | | |
|  |  | |  | |  |
| **CdK** | | | | | |
|  | |  | |  | |
| **CdK parameters** | | | | | |
|  |  | |  | |  |
| **Global Parameters** | | | | | |
|  | | |  | | |

| **Transcriptional Response Module** | | | | | |
| --- | --- | --- | --- | --- | --- |
| **NfKb** | | | | | |
|  | |  | |  | |
| **NfKb parameters** | | | | | |
|  |  | |  | |  |
| **ImR** | | | | | |
|  | |  | |  | |
| **ImR parameters** | | | | | |
|  | |  | |  | |
| **IKB** | | | | | |
|  | |  | |  | |
| **IKB parameters** | | | | | |
|  |  | |  | |  |
| **NfKB- Downstream Genes** | | | | | |
|  | |  | |  | |
| **Downstream Gene Parameters** | | | | | |
|  | |  | |  | |
| **Beta_Catenin** | | | | | |
|  | |  | |  | |
| **Beta-Catenin Parameters** | | | | | |
|  | |  | |  | |

| **HH Response Module** | | | | | | | | | | | | | | | | | | | | | | | | | | |
| --- | --- | --- | --- | --- | --- | --- | --- | --- | --- | --- | --- | --- | --- | --- | --- | --- | --- | --- | --- | --- | --- | --- | --- | --- | --- | --- |
| **Wnt Equations** | | | | | | | | | | | | | | | | | | | | | | | | | | |
|  | | | | |  | | | | | | | | | | | |  | | | | | | | | | |
| Wnt Parameters | | | | | | | | | | | | | | | | | | | | | | | | | | |
| = -1 | | | | |  | | | | | | | |  | | | | | | | | | |  | | | |
| **Ihh Equations** | | | | | | | | | | | | | | | | | | | | | | | | | | |
|  | | | | |  | | | | | | | | | | | | | |  | | | | | | | |
| Ihh Parameters | | | | | | | | | | | | | | | | | | | | | | | | | | |
| = - 0.9 | | | | = -1 | | | | | | | | | | | | |  | | | | | | | | | |
| **Shh Equations** | | | | | | | | | | | | | | | | | | | | | | | | | | |
|  | | | | | | | | | | | | | |  | | | | | | | | |  | | | |
| Shh Parameters | | | | | | | | | | | | | | | | | | | | | | | | | | |
|  |  | | | | | | | = 2.3 | | | | | | |  | | | | | | | | | | |  |
| **TGF Equations** | | | | | | | | | | | | | | | | | | | | | | | | | | |
|  | | | | |  | | | | | | | | | | | | | | | |  | | | | | |
| TGF Parameters | | | | | | | | | | | | | | | | | | | | | | | | | | |
|  | | | | | | |  | | | | | | | | | | | | | | | | |  | | |
| **BMMSC Equations** | | | | | | | | | | | | | | | | | | | | | | | | | | |
|  | | | | | | | | |  | | | | | | | | | | |  | | | | | | |
| BMMSC Parameters | | | | | | | | | | | | | | | | | | | | | | | | | | |
|  | | |  | | | | | | | | |  | | | | | | | | | | | | |  | |
| **Gas Equations** | | | | | | | | | | | | | | | | | | | | | | | | | | |
|  | | | | | | | |  | | | | | | | |  | | | | | | | | | | |
| Gas Parameters | | | | | | | | | | | | | | | | | | | | | | | | | | |
|  | | | | | |  | | | | | | | | | | | | | | | | | |  | | |
| **Atrophy Module** | | | | | | | | | | | | | | | | | | | | | | | | | | |
| **IL-1 Equations** | | | | | | | | | | | | | | | | | | | | | | | | | | |
|  | | | |  | | | | | | | | | | | | | |  | | | | | | | | |
| IL-1 Parameters | | | | | | | | | | | | | | | | | | | | | | | | | | |
|  | | | | |  | | | | | | | | | | | |  | | | | | | | | | |
| **Acid Equations** | | | | | | | | | | | | | | | | | | | | | | | | | | |
|  | | | | | | | | | |  | | | | | | | | | | | |  | | | | |
| Acid Parameters | | | | | | | | | | | | | | | | | | | | | | | | | | |
|  | |  | | | | | | | | |  | | | | | | | | | | |  | | | | |
